# Supplementary material
Source: PubMed Central journal article supplement (PMC7548032)
Supplement: NIHMS1630501-supplement-Table_1.pdf [file NIHMS1630501-supplement-Table_1.pdf]

## SUPPLEMENTARY TABLE

Supplementary Table 1. Respondent characteristics

| School / specialty                              | ROs (n=22) |               |             |             | MS1s (n=315) |               |             |             | MS4s (n=404) |               |             |             | PCPs (n=43) |               |             |             | MS4s or PCPs with RO rotation in med school (n=42) |             |
|-------------------------------------------------|------------|---------------|-------------|-------------|--------------|---------------|-------------|-------------|--------------|---------------|-------------|-------------|-------------|---------------|-------------|-------------|----------------------------------------------------|-------------|
|                                                 | n          | response rate |             |             | n            | response rate |             |             | n            | response rate |             |             | n           | response rate |             |             | n                                                  | %           |
|                                                 |            | % of all      | n contacted | % responded |              | % of all      | n contacted | % responded |              | % of all      | n contacted | % responded |             | % of all      | n contacted | % responded |                                                    |             |
| Drexel University                               | 0          | 0%            | 3           | 0%          | 35           | 11%           | 267         | 13%         | 50           | 11%           | 261         | 19%         | 4           | 8%            | 35          | 11%         | 4                                                  | 10%         |
| Temple University and Fox Chase Cancer Center   | 12         | 55%           | 12          | 100%        | 58           | 18%           | 182         | 32%         | 75           | 17%           | 181         | 41%         | 7           | 13%           | 34          | 21%         | 7                                                  | 14%         |
| Thomas Jefferson University                     | 4          | 18%           | 8           | 50%         | 59           | 18%           | 225         | 26%         | 66           | 15%           | 213         | 31%         | 2           | 4%            | 24          | 8%          | 11                                                 | 26%         |
| Rowan University School of Osteopathic Medicine | 0          | 0%            | 0           | N/A         | 49           | 15%           | 163         | 30%         | 58           | 13%           | 160         | 36%         | 4           | 8%            | 28          | 14%         | 2                                                  | 5%          |
| University of Toledo                            | 1          | 5%            | 2           | 50%         | 31           | 10%           | 150         | 21%         | 75           | 17%           | 150         | 50%         | 4           | 8%            | 27          | 15%         | 2                                                  | 2%          |
| University of Virginia                          | 3          | 14%           | 6           | 50%         | 46           | 15%           | 162         | 28%         | 51           | 12%           | 155         | 33%         | 10          | 19%           | 58          | 17%         | 12                                                 | 29%         |
| University of Wisconsin                         | 2          | 9%            | 19          | 11%         | 37           | 12%           | 175         | 21%         | 20a          | 6%            | 175         | 11%         | 12          | 23%           | 129         | 9%          | 4                                                  | 10%         |
| Not reported                                    | 0          | 0%            |             |             | 0            | 0%            |             |             | 8            | 2%            |             |             | 0           | 0%            |             |             | 0                                                  | 0%          |
| <b>Sum of institutions</b>                      | <b>22</b>  | <b>100%</b>   | <b>50</b>   | <b>44%</b>  | <b>315</b>   | <b>100%</b>   | <b>1324</b> | <b>24%</b>  | <b>403</b>   | <b>100%</b>   | <b>1295</b> | <b>31%</b>  | <b>43</b>   | <b>100%</b>   | <b>335</b>  | <b>13%</b>  | <b>42</b>                                          | <b>100%</b> |
| Performed RO rotation in med school             | 21         | 95%           |             |             | 2            | 1%            |             |             | 40           | 9%            |             |             | 2           | 4%            |             |             | 42                                                 | 100%        |
| What is your area of interest/specialty?        |            |               |             |             |              |               |             |             |              |               |             |             |             |               |             |             |                                                    |             |
| • Anesthesiology                                |            |               |             |             | 4            | 1%            |             |             | 26           | 7%            |             |             |             |               |             |             | 1                                                  | 2%          |
| • Cardiology                                    |            |               |             |             | 14           | 4%            |             |             | 6            | 2%            |             |             |             |               |             |             |                                                    |             |
| • Dermatology                                   |            |               |             |             | 7            | 2%            |             |             | 10           | 3%            |             |             |             |               |             |             |                                                    |             |
| • Emergency Medicine                            |            |               |             |             | 26           | 8%            |             |             | 39           | 10%           |             |             |             |               |             |             | 3                                                  | 6%          |
| • Family medicine                               |            |               |             |             | 27           | 9%            |             |             | 27           | 7%            |             |             | 23          | 53%           |             |             | 2                                                  | 4%          |
| • Gastroenterology                              |            |               |             |             | 4            | 1%            |             |             | 1            | 0%            |             |             |             |               |             |             |                                                    |             |
| • Hematology/oncology                           |            |               |             |             | 10           | 3%            |             |             | 10           | 3%            |             |             |             |               |             |             | 4                                                  | 8%          |
| • Infectious disease                            |            |               |             |             | 5            | 2%            |             |             | 2            | 0%            |             |             |             |               |             |             |                                                    |             |
| • Internal medicine                             |            |               |             |             | 23           | 7%            |             |             | 63           | 16%           |             |             | 20          | 47%           |             |             | 4                                                  | 8%          |
| • Neurology                                     |            |               |             |             | 6            | 2%            |             |             | 10           | 3%            |             |             |             |               |             |             | 1                                                  | 2%          |
| • Neurosurgery                                  |            |               |             |             | 3            | 1%            |             |             | 3            | 2%            |             |             |             |               |             |             |                                                    |             |
| • Nuclear medicine                              |            |               |             |             | 0            | 0%            |             |             | 0            | 0%            |             |             |             |               |             |             |                                                    |             |
| • Obstetrics/gynecology                         |            |               |             |             | 10           | 3%            |             |             | 20           | 5%            |             |             |             |               |             |             | 1                                                  | 2%          |
| • Oral maxillofacial surgery                    |            |               |             |             | 0            | 0%            |             |             | 0            | 0%            |             |             |             |               |             |             |                                                    |             |
| • Ophthalmology                                 |            |               |             |             | 7            | 2%            |             |             | 9            | 2%            |             |             |             |               |             |             |                                                    |             |
| • Orthopedics                                   |            |               |             |             | 19           | 6%            |             |             | 17           | 4%            |             |             |             |               |             |             | 1                                                  | 2%          |
| • Otolaryngology                                |            |               |             |             | 2            | 1%            |             |             | 6            | 2%            |             |             |             |               |             |             | 2                                                  | 4%          |
| • Pathology                                     |            |               |             |             | 3            | 1%            |             |             | 5            | 1%            |             |             |             |               |             |             | 1                                                  | 2%          |
| • Pediatrics                                    |            |               |             |             | 35           | 11%           |             |             | 43           | 11%           |             |             |             |               |             |             | 4                                                  | 8%          |
| • Plastic surgery                               |            |               |             |             | 2            | 1%            |             |             | 2            | 1%            |             |             |             |               |             |             |                                                    |             |
| • Physical medicine and Rehab                   |            |               |             |             | 7            | 2%            |             |             | 7            | 2%            |             |             |             |               |             |             |                                                    |             |
| • Psychiatry                                    |            |               |             |             | 2            | 1%            |             |             | 7            | 2%            |             |             |             |               |             |             |                                                    |             |
| • Pulmonology                                   |            |               |             |             | 0            | 0%            |             |             | 0            | 0%            |             |             |             |               |             |             |                                                    |             |
| • Radiation oncology                            |            |               |             |             | 14           | 4%            |             |             | 13           | 3%            |             |             |             |               |             |             | 13                                                 | 25%         |
| • Radiology                                     |            |               |             |             | 5            | 2%            |             |             | 19           | 5%            |             |             |             |               |             |             | 2                                                  | 4%          |
| • Rheumatology                                  |            |               |             |             | 0            | 0%            |             |             | 0            | 0%            |             |             |             |               |             |             |                                                    |             |
| • Surgery                                       |            |               |             |             | 30           | 10%           |             |             | 30           | 8%            |             |             |             |               |             |             | 2                                                  | 4%          |
| • Urology                                       |            |               |             |             | 1            | 0%            |             |             | 6            | 2%            |             |             |             |               |             |             |                                                    |             |
| • Other / unsure                                |            |               |             |             | 16           | 5%            |             |             | 5            | 1%            |             |             |             |               |             |             | 1                                                  | 2%          |

Abbreviations: MS1: first year medical student; MS4: fourth year medical student; PCP: primary care physician; RO: radiation oncologist/oncology; RT: radiation therapy

Note: p-values < 0.05 are bold-faced
